# Supplementary material for: Dissemination of Phytophthora cinnamomi by feral pigs
Source: Frontiers journal article supplement (doi:10.3389/fonc.2024.1411436), 2009-01-01
Supplement: Data_Sheet_1.ZIP [file Data_Sheet_1.ZIP]

**Table S1.** Baseline clinical characteristics of patients in our cohort (N=175)

| Characteristics                      | No. of patients (Proportion) | P value         |
|--------------------------------------|------------------------------|-----------------|
| <b>Sex</b>                           |                              | 0.2448          |
| Male                                 | 155(88.57%)                  |                 |
| Female                               | 20(11.43%)                   |                 |
| <b>T stage</b>                       |                              | <b>0.0171*</b>  |
| T1                                   | 20(11.43%)                   |                 |
| T2                                   | 77(44.00%)                   |                 |
| T3                                   | 53(30.28%)                   |                 |
| T4                                   | 25(14.29%)                   |                 |
| <b>N stage</b>                       |                              | 0.4054          |
| N0                                   | 32(18.29%)                   |                 |
| N1                                   | 51(29.14%)                   |                 |
| N2                                   | 91(52.00%)                   |                 |
| N3                                   | 1(0.57%)                     |                 |
| <b>AJCC Stage</b>                    |                              | 0.4975          |
| I                                    | 6(3.43%)                     |                 |
| II                                   | 53(30.28%)                   |                 |
| III                                  | 116(66.29%)                  |                 |
| <b>Pathological types</b>            |                              | 0.1882          |
| LUSC                                 | 123(70.29%)                  |                 |
| Others                               | 52(29.71%)                   |                 |
| <b>Smoking</b>                       |                              | <b>0.0065**</b> |
| No                                   | 61(34.86%)                   |                 |
| Yes                                  | 114(65.14%)                  |                 |
| <b>CPR</b>                           |                              | <b>0.0056**</b> |
| No                                   | 108(61.71%)                  |                 |
| Yes                                  | 67(38.29%)                   |                 |
| <b>MPR</b>                           |                              | <b>0.0041**</b> |
| No                                   | 80(45.71%)                   |                 |
| Yes                                  | 95(54.29%)                   |                 |
| <b>Preoperative treatment course</b> |                              | 0.1448          |
| 1                                    | 2(1.14%)                     |                 |
| 2                                    | 130(74.29%)                  |                 |
| 3                                    | 36(20.57%)                   |                 |
| 4                                    | 7(4.00%)                     |                 |
| <b>Surgical methods</b>              |                              | 0.9807          |
| Thoroscopic surgery                  | 156(89.14%)                  |                 |
| Thoracotomy                          | 5(2.86%)                     |                 |
| Thoroscopic to thoracotomy           | 14(8.00%)                    |                 |
| <b>Pulmonary lobectomy</b>           |                              | 0.5932          |
| Upper left                           | 121(69.14%)                  |                 |
| Lower left                           | 31(17.71%)                   |                 |
| Upper right                          | 16(9.14%)                    |                 |

|                                 |                        |        |
|---------------------------------|------------------------|--------|
| Middle right                    | 5(2.86%)               |        |
| Lower right                     | 2(1.14%)               |        |
| <b>Postoperative treatment</b>  |                        | 0.2592 |
| No                              | 17(9.71%)              |        |
| Yes                             | 158(90.29%)            |        |
| <b>COPD</b>                     |                        | 0.9165 |
| No                              | 111(63.43%)            |        |
| Yes                             | 64(36.57%)             |        |
| <b>Hypertension</b>             |                        | 0.7480 |
| No                              | 135(77.14%)            |        |
| Yes                             | 40(22.86%)             |        |
| <b>Diabetes</b>                 |                        | 0.9735 |
| No                              | 165(94.29%)            |        |
| Yes                             | 10(5.71%)              |        |
| <b>Coronary.disease</b>         |                        | 0.8745 |
| No                              | 169(96.57%)            |        |
| Yes                             | 6(3.43%)               |        |
| <b>Hyperlipidemia</b>           |                        | 0.2237 |
| No                              | 171(97.71%)            |        |
| Yes                             | 4(2.29%)               |        |
| <b>Efficacy evaluation</b>      |                        | 0.3454 |
| Complete response               | 4(2.29%)               |        |
| Partial response                | 110(62.85%)            |        |
| Stable disease                  | 60(32.28%)             |        |
| Unknown                         | 1(0.57%)               |        |
| <b>Immune related pneumonia</b> |                        | 0.6241 |
| No                              | 148(81.32%)            |        |
| Yes                             | 27(14.84%)             |        |
| <b>Age</b>                      |                        | 0.6264 |
| Mean±SD                         | 63.74±7.95             |        |
| Median[min-max]                 | 65.00[40.00,81.00]     |        |
| <b>Weight</b>                   |                        | 0.3104 |
| Mean±SD                         | 63.73±10.24            |        |
| Median[min-max]                 | 64.00[43.00,98.00]     |        |
| <b>Height</b>                   |                        | 0.9801 |
| Mean±SD                         | 166.17±6.51            |        |
| Median[min-max]                 | 167.00[149.00,179.00]  |        |
| <b>BMI</b>                      |                        | 0.3137 |
| Mean±SD                         | 23.03±3.12             |        |
| Median[min-max]                 | 23.18[15.94,33.13]     |        |
| <b>D-dimer</b>                  |                        | 0.0887 |
| Mean±SD                         | 524.46±433.41          |        |
| Median[min-max]                 | 380.00[140.00,3620.00] |        |

|                         |                      |        |
|-------------------------|----------------------|--------|
| <b>WBC</b>              |                      | 0.1305 |
| Mean±SD                 | 7.10±2.14            |        |
| Median[min-max]         | 6.80[2.40,13.30]     |        |
| <b>Fibrinogen</b>       |                      | 0.9086 |
| Mean±SD                 | 4.28±1.39            |        |
| Median[min-max]         | 4.10[1.99,8.77]      |        |
| <b>VT actual</b>        |                      | 0.9187 |
| Mean±SD                 | 1.07±0.43            |        |
| Median[min-max]         | 0.98[0.27,2.78]      |        |
| <b>MV actual</b>        |                      | 0.3738 |
| Mean±SD                 | 28.55±14.16          |        |
| Median[min-max]         | 24.97[8.09,70.82]    |        |
| <b>VCM actual</b>       |                      | 0.7573 |
| Mean±SD                 | 3.34±0.70            |        |
| Median[min-max]         | 3.31[1.61,5.18]      |        |
| <b>FVC actual</b>       |                      | 0.7687 |
| Mean±SD                 | 3.32±0.70            |        |
| Median[min-max]         | 3.30[1.61,5.18]      |        |
| <b>FEV1 actual</b>      |                      | 0.8323 |
| Mean±SD                 | 2.41±0.59            |        |
| Median[min-max]         | 2.41[1.10,4.04]      |        |
| <b>FEV1/FVC actual</b>  |                      | 0.8172 |
| Mean±SD                 | 72.49±8.97           |        |
| Median[min-max]         | 74.00[48.59,99.56]   |        |
| <b>PEF actual</b>       |                      | 0.7285 |
| Mean±SD                 | 6.36±1.82            |        |
| Median[min-max]         | 6.42[2.16,13.24]     |        |
| <b>PEF AER</b>          |                      | 0.5613 |
| Mean±SD                 | 84.84±21.65          |        |
| Median[min-max]         | 86.00[38.20,147.10]  |        |
| <b>PIF actual</b>       |                      | 0.8526 |
| Mean±SD                 | 3.84±1.49            |        |
| Median[min-max]         | 3.62[1.42,8.37]      |        |
| <b>FET actual</b>       |                      | 0.5727 |
| Mean±SD                 | 7.28±2.65            |        |
| Median[min-max]         | 6.89[1.85,15.57]     |        |
| <b>RV/TLC-SB actual</b> |                      | 0.6339 |
| Mean±SD                 | 42.20±8.26           |        |
| Median[min-max]         | 42.04[14.59,74.10]   |        |
| <b>RV/TLC-SB AER</b>    |                      | 0.8627 |
| Mean±SD                 | 109.84±19.56         |        |
| Median[min-max]         | 110.20[41.70,177.30] |        |
| <b>DLCOc SB actual</b>  |                      | 0.1628 |
| Mean±SD                 | 6.33±1.57            |        |

|                        |                       |                |
|------------------------|-----------------------|----------------|
| Median[min-max]        | 6.22[2.80,11.01]      |                |
| <b>DLCOc SB AER</b>    |                       | 0.0950         |
| Mean±SD                | 76.60±16.81           |                |
| Median[min-max]        | 76.20[32.20,127.30]   |                |
| <b>DLCOc/VA actual</b> |                       | 0.3607         |
| Mean±SD                | 1.24±0.25             |                |
| Median[min-max]        | 1.25[0.63,2.09]       |                |
| <b>DLCOc/VA AER</b>    |                       | 0.2366         |
| Mean±SD                | 90.79±17.79           |                |
| Median[min-max]        | 90.40[48.40,176.60]   |                |
| <b>VA actual</b>       |                       | 0.9401         |
| Mean±SD                | 5.07±0.87             |                |
| Median[min-max]        | 5.04[3.36,7.86]       |                |
| <b>VA AER</b>          |                       | 0.9991         |
| Mean±SD                | 86.14±12.96           |                |
| Median[min-max]        | 85.50[60.00,137.50]   |                |
| <b>DAR</b>             |                       | 0.0792         |
| Mean±SD                | 8.25±6.65             |                |
| Median[min-max]        | 6.06[2.37,54.03]      |                |
| <b>DWR</b>             |                       | 0.1437         |
| Mean±SD                | 8.68±8.34             |                |
| Median[min-max]        | 6.48[1.94,75.42]      |                |
| <b>DHR</b>             |                       | 0.0762         |
| Mean±SD                | 3.16±2.62             |                |
| Median[min-max]        | 2.31[0.92,21.29]      |                |
| <b>DBR</b>             |                       | 0.1884         |
| Mean±SD                | 23.83±22.87           |                |
| Median[min-max]        | 17.65[5.74,217.95]    |                |
| <b>DWBCR</b>           |                       | <b>0.0472*</b> |
| Mean±SD                | 77.86±63.42           |                |
| Median[min-max]        | 59.76[12.61,446.00]   |                |
| <b>DFR</b>             |                       | <b>0.0473*</b> |
| Mean±SD                | 122.49±83.58          |                |
| Median[min-max]        | 98.65[35.15,592.78]   |                |
| <b>DVTAR</b>           |                       | 0.0947         |
| Mean±SD                | 594.59±658.44         |                |
| Median[min-max]        | 423.08[85.94,5048.78] |                |
| <b>DMVAR</b>           |                       | <b>0.0172*</b> |
| Mean±SD                | 24.75±26.85           |                |
| Median[min-max]        | 15.28[3.19,178.68]    |                |
| <b>DVCMAR</b>          |                       | 0.0655         |
| Mean±SD                | 166.80±151.87         |                |
| Median[min-max]        | 117.83[47.41,1222.97] |                |
| <b>DFVCAR</b>          |                       | 0.0633         |

|                        |                       |        |
|------------------------|-----------------------|--------|
| Mean±SD                | 167.69±152.35         |        |
| Median[min-max]        | 118.81[47.41,1222.97] |        |
| <b>DFEV1AR</b>         |                       | 0.1021 |
| Mean±SD                | 236.49±224.47         |        |
| Median[min-max]        | 162.16[58.82,1989.01] |        |
| <b>DFEV1/FVCAR</b>     |                       | 0.1488 |
| Mean±SD                | 7.42±6.57             |        |
| Median[min-max]        | 5.22[2.15,58.83]      |        |
| <b>DPEFAR</b>          |                       | 0.1286 |
| Mean±SD                | 93.39±95.38           |        |
| Median[min-max]        | 63.68[21.48,809.84]   |        |
| <b>DPEF.AERR</b>       |                       | 0.1830 |
| Mean±SD                | 6.86±6.92             |        |
| Median[min-max]        | 4.73[1.74,63.62]      |        |
| <b>DPIFAR</b>          |                       | 0.2592 |
| Mean±SD                | 165.02±187.06         |        |
| Median[min-max]        | 114.19[30.86,1652.97] |        |
| <b>DFETAR</b>          |                       | 0.1012 |
| Mean±SD                | 83.70±79.10           |        |
| Median[min-max]        | 56.63[18.43,477.53]   |        |
| <b>DRV.TLC.SBAR</b>    |                       | 0.1321 |
| Mean±SD                | 13.01±11.65           |        |
| Median[min-max]        | 9.57[2.10,91.44]      |        |
| <b>DRV.TLC.SB.AERR</b> |                       | 0.1411 |
| Mean±SD                | 5.02±4.65             |        |
| Median[min-max]        | 3.61[0.79,35.95]      |        |
| <b>DDLCOc.SBAR</b>     |                       | 0.1947 |
| Mean±SD                | 94.34±116.41          |        |
| Median[min-max]        | 64.52[17.56,1292.86]  |        |
| <b>DDLCOc.SB.AERR</b>  |                       | 0.2614 |
| Mean±SD                | 7.65±9.70             |        |
| Median[min-max]        | 5.31[1.52,112.42]     |        |
| <b>DDLCOc.VAAR</b>     |                       | 0.2292 |
| Mean±SD                | 461.35±513.53         |        |
| Median[min-max]        | 330.36[95.89,5656.25] |        |
| <b>DDLCOc.VA.AERR</b>  |                       | 0.2222 |
| Mean±SD                | 6.21±6.80             |        |
| Median[min-max]        | 4.55[1.42,74.79]      |        |
| <b>DVAAR</b>           |                       | 0.0742 |
| Mean±SD                | 107.62±97.86          |        |
| Median[min-max]        | 75.57[29.51,826.48]   |        |
| <b>DVA.AERR</b>        |                       | 0.1200 |
| Mean±SD                | 6.31±5.81             |        |
| Median[min-max]        | 4.41[1.69,53.16]      |        |

---

Bold values indicate  $P < 0.05$  and \*  $P < 0.05$ , \*\* $P < 0.01$ . AJCC, American Joint Committee on Cancer; CPR, complete pathologic response; MPR, major pathologic response; COPD, chronic obstructive pulmonary disease; BMI, body mass index; SD, standard deviation; WBC, white blood cell; VT, tidal volume; MV, minute ventilation volume; VCM, vital capacity max; FVC, forced vital capacity; FEV1, forced expiratory volume in one second; PEF, peak expiratory flow; AER, actual to estimate ratio; PIF, peak inspiratory flow; FET, Forced Expiratory Time; RV/TLC, Residual Volume to Total Lung Capacity ratio; SB, single breath; DLCOc, Diffusing capacity of the lung for carbon monoxide corrected for haemoglobin concentration; VA, alveolar volume; DXXR, D-dimer/XX ratio, and XX indicate the continuous variables listed in the table.

**Table S2.** Comparative analysis of discrimination indexes of the three models in our study

| Indexes                                        | Cox regression<br>model  | P-value      | LASSO regression<br>model | P-value | Ridge regression<br>model |
|------------------------------------------------|--------------------------|--------------|---------------------------|---------|---------------------------|
| <b>ROC AUC (95% CI)</b>                        |                          |              |                           |         |                           |
| 1-year DFS                                     | 0.756<br>(0.663, 0.850)  |              | 0.725<br>(0.630, 0.819)   |         | 0.743<br>(0.649, 0.837)   |
| 2-years DFS                                    | 0.807<br>(0.664, 0.951)  |              | 0.811<br>(0.6774, 0.945)  |         | 0.814<br>(0.684, 0.943)   |
| 3-years DFS                                    | 0.825<br>(0.646, 1.003)  |              | 0.723<br>(0.506, 0.940)   |         | 0.786<br>(0.598, 0.973)   |
| <b>DCA AUC</b>                                 |                          |              |                           |         |                           |
| 1-year DFS                                     | 0.007                    |              | 0.010                     |         | 0.012                     |
| 2-years DFS                                    | 0.050                    |              | 0.074                     |         | 0.071                     |
| 3-years DFS                                    | 0.089                    |              | 0.095                     |         | 0.131                     |
| <b>IDI<sup>s</sup> (95% CI)</b>                |                          |              |                           |         |                           |
| 1-year DFS                                     | 0.012<br>(-0.039, 0.047) | 0.479        | 0.009<br>(-0.013, 0.033)  | 0.379   |                           |
| 2-years DFS                                    | 0.044<br>(-0.045, 0.146) | 0.259        | 0.003<br>(-0.059, 0.062)  | 0.922   |                           |
| 3-years DFS                                    | 0.034<br>(-0.162, 0.224) | 0.510        | 0.032<br>(-0.074, 0.118)  | 0.332   |                           |
| <b>Continuous-NRI<sup>s</sup> (95% CI)</b>     |                          |              |                           |         |                           |
| 1-year DFS                                     | 0.253<br>(0.030, 0.482)  | <b>0.025</b> | 0.185<br>(-0.169, 0.403)  | 0.293   |                           |
| 2-years DFS                                    | 0.269<br>(-0.242, 0.628) | 0.154        | 0.031<br>(-0.0565, 0.472) | 0.926   |                           |
| 3-years DFS                                    | 0.157<br>(-0.812, 1.009) | 0.613        | 0.374<br>(-0.877, 1.196)  | 0.422   |                           |
| <b>Median improvement<sup>s</sup> (95% CI)</b> |                          |              |                           |         |                           |
| 1-year DFS                                     | 0.028<br>(0.005, 0.078)  | <b>0.014</b> | 0.009<br>(-0.008, 0.041)  | 0.267   |                           |
| 2-years DFS                                    | 0.092<br>(-0.041, 0.192) | 0.164        | 0.000<br>(-0.050, 0.058)  | 0.886   |                           |
| 3-years DFS                                    | 0.029<br>(-0.133, 0.236) | 0.732        | 0.030<br>(-0.050, 0.100)  | 0.488   |                           |

\$ compared with the ridge regression model. Bold values indicate  $P < 0.05$ . LASSO, least absolute shrinkage and selection operator; ROC, receiver operating characteristic; AUC, area under the curve; DCA, decision curve analysis; NRI, net reclassification index; IDI, integrated discrimination improvement.
